# Supplementary material for: Integrating full-length transcriptomics and metabolomics reveals the regulatory mechanisms underlying yellow pigmentation in tree peony (Paeonia suffruticosa Andr.) flowers
Source: PubMed Central journal article supplement (PMC8558324; doi:10.1038/s41438-021-00666-0), 2021-11-01
Supplement: 41438_2021_666_MOESM1_ESM.pdf [file 41438_2021_666_MOESM1_ESM.pdf]

**Supplementary Table 1 Sequencing data statistics**

| Sample Name | Sample ID | cDNA size | SMRT Cells | Reads of Insert | Read Bases of Insert | Mean Read Length of Insert | Mean Read Quality of Insert | Mean Number of Passes |
|-------------|-----------|-----------|------------|-----------------|----------------------|----------------------------|-----------------------------|-----------------------|
| Tree peony  | F01       | 1-6k      | 1          | 473,062         | 891,073,753          | 1,883                      | 0.97                        | 27                    |

**Supplementary Table 2 Full length sequence data**

| Samples | cDNA Size | Reads of Insert | Number of five prime reads | Number of three prime reads | Number of poly-A reads | Number of filtered short reads | Number of non-full-length reads | Number of full-length reads | Number of non-chimeric reads | Number of full-length non-chimeric read length | Average full-length non-chimeric | Full-Length non-chimeric Percentage (FLNC%) | Artificial Concatemers (%) |
|---------|-----------|-----------------|----------------------------|-----------------------------|------------------------|--------------------------------|---------------------------------|-----------------------------|------------------------------|------------------------------------------------|----------------------------------|---------------------------------------------|----------------------------|
|         |           |                 |                            |                             |                        |                                |                                 |                             |                              |                                                |                                  |                                             |                            |
| F01     | 1-6k      | 473,062         | 409,110                    | 410,242                     | 403,351                | 16,494                         | 90,044                          | 366,524                     | 359,771                      | 1,825                                          | 76.10%                           | 1.84%                                       |                            |

**Supplementary Table 3 Clustering results by ICE**

| Samples | cDNA Size | Number of consensus isoforms | Average consensus isoforms read length | Number of polished high-quality isoforms | Number of polished low-quality isoforms | Percent of polished high-quality isoforms (%) |
|---------|-----------|------------------------------|----------------------------------------|------------------------------------------|-----------------------------------------|-----------------------------------------------|
| F01     | 1-6k      | 158,245                      | 2,007                                  | 117,680                                  | 40,102                                  | 74.37%                                        |

**Supplementary Table 4 Data output statistics using the SGS sequencing platform**

| Samples      | Read Number | Base Number   | GC Content | % ≥ Q30 |
|--------------|-------------|---------------|------------|---------|
| High Noon'-1 | 23,743,135  | 7,083,754,008 | 45.18      | 95.29   |
| High Noon'-2 | 27,363,068  | 8,171,858,244 | 45.71      | 94.73   |

|                |            |               |       |       |
|----------------|------------|---------------|-------|-------|
| High Noon'-3   | 26,151,034 | 7,817,595,230 | 45.35 | 95.15 |
| Roufufurong'-1 | 23,849,725 | 7,102,437,096 | 45.54 | 94.91 |
| Roufufurong'-2 | 24,209,670 | 7,231,381,174 | 44.80 | 95.28 |
| Roufufurong'-3 | 28,420,112 | 8,471,070,046 | 45.12 | 95.14 |

#### Supplementary Table 5 Annotation of transcript datasets to public databases

| Annotated databases | Annotated number | 300<=Length<1000 | Length>1000 |
|---------------------|------------------|------------------|-------------|
| COG                 | 24,465           | 3,299            | 21,166      |
| GO                  | 30,995           | 5,428            | 25,566      |
| KEGG                | 26,108           | 4,714            | 21,392      |
| KOG                 | 36,590           | 5,586            | 31,002      |
| Pfam                | 47,713           | 6,969            | 40,743      |
| Swiss-Prot          | 45,865           | 7,282            | 38,581      |
| eggNOG              | 55,743           | 9,525            | 46,216      |
| Nr                  | 56,674           | 9,853            | 46,819      |
| All annotated       | 56,974           | 9,972            | 46,999      |

#### Supplementary Table 6 Genes mapped to 125 KEGG biochemical pathways

| #pathway                                 | pathway_id | Gene_number |
|------------------------------------------|------------|-------------|
| Glycolysis / Gluconeogenesis             | ko00010    | 598         |
| Citrate cycle (TCA cycle)                | ko00020    | 335         |
| Pentose phosphate pathway                | ko00030    | 255         |
| Pentose and glucuronate interconversions | ko00040    | 282         |
| Fructose and mannose metabolism          | ko00051    | 222         |

|                                                     |         |     |
|-----------------------------------------------------|---------|-----|
| Galactose metabolism                                | ko00052 | 270 |
| Ascorbate and aldarate metabolism                   | ko00053 | 185 |
| Fatty acid biosynthesis                             | ko00061 | 207 |
| Fatty acid elongation                               | ko00062 | 91  |
| Fatty acid degradation                              | ko00071 | 238 |
| Synthesis and degradation of ketone bodies          | ko00072 | 26  |
| Cutin, suberine and wax biosynthesis                | ko00073 | 249 |
| Steroid biosynthesis                                | ko00100 | 93  |
| Ubiquinone and other terpenoid-quinone biosynthesis | ko00130 | 102 |
| Oxidative phosphorylation                           | ko00190 | 583 |
| Photosynthesis                                      | ko00195 | 135 |
| Photosynthesis - antenna proteins                   | ko00196 | 49  |
| Purine metabolism                                   | ko00230 | 479 |
| Caffeine metabolism                                 | ko00232 | 10  |
| Pyrimidine metabolism                               | ko00240 | 340 |
| Alanine, aspartate and glutamate metabolism         | ko00250 | 212 |
| Glycine, serine and threonine metabolism            | ko00260 | 283 |
| Cysteine and methionine metabolism                  | ko00270 | 415 |
| Valine, leucine and isoleucine degradation          | ko00280 | 215 |
| Valine, leucine and isoleucine biosynthesis         | ko00290 | 88  |
| Lysine biosynthesis                                 | ko00300 | 51  |
| Lysine degradation                                  | ko00310 | 126 |
| Arginine and proline metabolism                     | ko00330 | 281 |
| Histidine metabolism                                | ko00340 | 58  |
| Tyrosine metabolism                                 | ko00350 | 148 |
| Phenylalanine metabolism                            | ko00360 | 180 |

|                                                       |         |     |
|-------------------------------------------------------|---------|-----|
| Tryptophan metabolism                                 | ko00380 | 99  |
| Phenylalanine, tyrosine and tryptophan biosynthesis   | ko00400 | 181 |
| beta-Alanine metabolism                               | ko00410 | 181 |
| Taurine and hypotaurine metabolism                    | ko00430 | 50  |
| Selenocompound metabolism                             | ko00450 | 127 |
| Cyanoamino acid metabolism                            | ko00460 | 221 |
| Glutathione metabolism                                | ko00480 | 313 |
| Starch and sucrose metabolism                         | ko00500 | 776 |
| N-Glycan biosynthesis                                 | ko00510 | 130 |
| Other glycan degradation                              | ko00511 | 136 |
| Other types of O-glycan biosynthesis                  | ko00514 | 23  |
| Amino sugar and nucleotide sugar metabolism           | ko00520 | 458 |
| Glycosaminoglycan degradation                         | ko00531 | 36  |
| Glycerolipid metabolism                               | ko00561 | 204 |
| Inositol phosphate metabolism                         | ko00562 | 191 |
| Glycosylphosphatidylinositol(GPI)-anchor biosynthesis | ko00563 | 75  |
| Glycerophospholipid metabolism                        | ko00564 | 249 |
| Ether lipid metabolism                                | ko00565 | 83  |
| Arachidonic acid metabolism                           | ko00590 | 51  |
| Linoleic acid metabolism                              | ko00591 | 54  |
| alpha-Linolenic acid metabolism                       | ko00592 | 188 |
| Sphingolipid metabolism                               | ko00600 | 112 |
| Glycosphingolipid biosynthesis - globo series         | ko00603 | 22  |
| Glycosphingolipid biosynthesis - ganglio series       | ko00604 | 23  |
| Pyruvate metabolism                                   | ko00620 | 436 |
| Glyoxylate and dicarboxylate metabolism               | ko00630 | 276 |

|                                               |         |     |
|-----------------------------------------------|---------|-----|
| Propanoate metabolism                         | ko00640 | 127 |
| Butanoate metabolism                          | ko00650 | 84  |
| C5-Branched dibasic acid metabolism           | ko00660 | 40  |
| One carbon pool by folate                     | ko00670 | 101 |
| Carbon fixation in photosynthetic organisms   | ko00710 | 376 |
| Thiamine metabolism                           | ko00730 | 91  |
| Riboflavin metabolism                         | ko00740 | 24  |
| Vitamin B6 metabolism                         | ko00750 | 63  |
| Nicotinate and nicotinamide metabolism        | ko00760 | 47  |
| Pantothenate and CoA biosynthesis             | ko00770 | 119 |
| Biotin metabolism                             | ko00780 | 61  |
| Lipoic acid metabolism                        | ko00785 | 9   |
| Folate biosynthesis                           | ko00790 | 47  |
| Porphyrin and chlorophyll metabolism          | ko00860 | 134 |
| Terpenoid backbone biosynthesis               | ko00900 | 260 |
| Monoterpenoid biosynthesis                    | ko00902 | 59  |
| Limonene and pinene degradation               | ko00903 | 31  |
| Diterpenoid biosynthesis                      | ko00904 | 9   |
| Brassinosteroid biosynthesis                  | ko00905 | 42  |
| Carotenoid biosynthesis                       | ko00906 | 101 |
| Zeatin biosynthesis                           | ko00908 | 26  |
| Sesquiterpenoid and triterpenoid biosynthesis | ko00909 | 67  |
| Nitrogen metabolism                           | ko00910 | 90  |
| Sulfur metabolism                             | ko00920 | 102 |
| Phenylpropanoid biosynthesis                  | ko00940 | 349 |
| Flavonoid biosynthesis                        | ko00941 | 115 |

|                                                        |         |      |
|--------------------------------------------------------|---------|------|
| Anthocyanin biosynthesis                               | ko00942 | 12   |
| Flavone and flavonol biosynthesis                      | ko00944 | 30   |
| Stilbenoid, diarylheptanoid and gingerol biosynthesis  | ko00945 | 33   |
| Isoquinoline alkaloid biosynthesis                     | ko00950 | 78   |
| Tropane, piperidine and pyridine alkaloid biosynthesis | ko00960 | 87   |
| Aminoacyl-tRNA biosynthesis                            | ko00970 | 268  |
| Biosynthesis of unsaturated fatty acids                | ko01040 | 140  |
| Carbon metabolism                                      | ko01200 | 1225 |
| 2-Oxocarboxylic acid metabolism                        | ko01210 | 254  |
| Fatty acid metabolism                                  | ko01212 | 367  |
| Degradation of aromatic compounds                      | ko01220 | 23   |
| Biosynthesis of amino acids                            | ko01230 | 1114 |
| Vancomycin resistance                                  | ko01502 | 3    |
| ABC transporters                                       | ko02010 | 68   |
| Ribosome biogenesis in eukaryotes                      | ko03008 | 303  |
| Ribosome                                               | ko03010 | 1062 |
| RNA transport                                          | ko03013 | 746  |
| mRNA surveillance pathway                              | ko03015 | 544  |
| RNA degradation                                        | ko03018 | 418  |
| RNA polymerase                                         | ko03020 | 132  |
| Basal transcription factors                            | ko03022 | 142  |
| DNA replication                                        | ko03030 | 116  |
| Spliceosome                                            | ko03040 | 826  |
| Proteasome                                             | ko03050 | 255  |
| Protein export                                         | ko03060 | 144  |
| Base excision repair                                   | ko03410 | 90   |

|                                             |         |     |
|---------------------------------------------|---------|-----|
| Nucleotide excision repair                  | ko03420 | 161 |
| Mismatch repair                             | ko03430 | 88  |
| Homologous recombination                    | ko03440 | 97  |
| Non-homologous end-joining                  | ko03450 | 24  |
| Phosphatidylinositol signaling system       | ko04070 | 185 |
| Plant hormone signal transduction           | ko04075 | 631 |
| Ubiquitin mediated proteolysis              | ko04120 | 474 |
| Sulfur relay system                         | ko04122 | 31  |
| SNARE interactions in vesicular transport   | ko04130 | 92  |
| Regulation of autophagy                     | ko04140 | 115 |
| Protein processing in endoplasmic reticulum | ko04141 | 961 |
| Endocytosis                                 | ko04144 | 498 |
| Phagosome                                   | ko04145 | 292 |
| Peroxisome                                  | ko04146 | 324 |
| Plant-pathogen interaction                  | ko04626 | 484 |
| Circadian rhythm - plant                    | ko04712 | 253 |

**Supplementary Table 7 Primers used for in-fusion cloning and qRT-PCR in tree peony.**

| <b>Primers</b>     | <b>Primer Sequences (5'-3')</b>           | <b>Description</b> |
|--------------------|-------------------------------------------|--------------------|
| <i>PsMYB4</i> -F   | ACACGGGGGACTCTTGACATGGGAAGGTCTCCTTGTGT    | In-fusion cloning  |
| <i>PsMYB4</i> -R   | AAGTTCCTTCTCCTTTACTCTTCATCTCCAATCTTCTGTA  | In-fusion cloning  |
| <i>PsMYB111</i> -F | ACACGGGGGACTCTTGACATGGGGAGGGCACCCCTGTTGT  | In-fusion cloning  |
| <i>PsMYB111</i> -R | AAGTTCCTTCTCCTTTACTAGAAAAGAAGCCAAGCAACCAT | In-fusion cloning  |
| <i>PsTT8</i> -F    | ACACGGGGGACTCTTGACATGGCTGCGCCCGCCGTA AAC  | In-fusion cloning  |
| <i>PsTT8</i> -R    | AAGTTCCTTCTCCTTTACTAGGAATTATTTGGTGTATTGC  | In-fusion cloning  |
| <i>PsEGL3</i> -F   | ACACGGGGGACTCTTGACATGGCAACTGGGCTCCAAATT   | In-fusion cloning  |

|                       |                                          |                        |
|-----------------------|------------------------------------------|------------------------|
| <i>PsEGL3</i> -R      | AAGTTCTTCTCCTTTACTACACTTGTGAATAACTCTCTG  | In-fusion cloning      |
| <i>PsSPL9</i> -F      | ACACGGGGGACTCTTGACATGGAAATGGGTTTCGAGCGTT | In-fusion cloning      |
| <i>PsSPL9</i> -R      | AAGTTCTTCTCCTTTACTAAGTGACCAGTTCATCTGCTG  | In-fusion cloning      |
| <i>PsUbiquitin</i> -F | GACCTATACCAAGCCGAAG                      | qRT-PCR for tree peony |
| <i>PsUbiquitin</i> -R | CGTTCAGCACCACAATC                        | qRT-PCR for tree peony |
| F01_cb7425_c19-F      | GTAATCTGGTGGTGGTTTCGT                    | qRT-PCR for tree peony |
| F01_cb7425_c19-R      | TCGTAAAGAAAGGAACCGTCA                    | qRT-PCR for tree peony |
| F01_cb9709_c126-F     | ACTACCAACTCACAAACTCC                     | qRT-PCR for tree peony |
| F01_cb9709_c126-R     | CGACCAAAGAATCCAAATGAG                    | qRT-PCR for tree peony |
| F01_cb13354_c0-F      | CGCAGGAGTAAGAGGTTTGGGA                   | qRT-PCR for tree peony |
| F01_cb13354_c0-R      | CTCTGAATATTGTTGGCCCGT                    | qRT-PCR for tree peony |
| F01_cb4550_c42-F      | GAGCATGGAGGTAGAAAAGAGT                   | qRT-PCR for tree peony |
| F01_cb4550_c42-R      | TCCCCATTCTTTGCTTGCACT                    | qRT-PCR for tree peony |
| F01_cb4550_c24-F      | CACTCTCAACCAAAAACAATCC                   | qRT-PCR for tree peony |
| F01_cb4550_c24-R      | CACTCTCAACCAAAAACAATCC                   | qRT-PCR for tree peony |
| F01_cb4853_c44-F      | AAAACCCTTCAATCCAGCTTC                    | qRT-PCR for tree peony |
| F01_cb4853_c44-R      | AAATCCCCAGTCTTCACATG                     | qRT-PCR for tree peony |
| F01_cb6443_c9-F       | TTTTGTGATACTGCCCCCTCT                    | qRT-PCR for tree peony |
| F01_cb6443_c9-R       | TATTTAGTGCAAAGATGGCCC                    | qRT-PCR for tree peony |
| F01_cb12671_c6-F      | GTAAATGGACTCTGGGTTTGA                    | qRT-PCR for tree peony |
| F01_cb12671_c6-R      | ATCCCTTTCCTCGGCATGTTT                    | qRT-PCR for tree peony |
| F01_cb7851_c6-F       | CGTCTTTGGTCTGCTGGGTT                     | qRT-PCR for tree peony |
| F01_cb7851_c6-R       | ACTGCTACTTCCACCACCATT                    | qRT-PCR for tree peony |
| F01_cb8732_c11-F      | AGAACAAAACCTACAACCGCC                    | qRT-PCR for tree peony |
| F01_cb8732_c11-R      | ATTCTGCTCTCTCTCCTC                       | qRT-PCR for tree peony |
| F01_cb8475_c68614-F   | GTTCCAGACAGTAGTGCCAAAG                   | qRT-PCR for tree peony |



|                     |                       |                        |
|---------------------|-----------------------|------------------------|
| F01_cb8475_c68614-R | CTTCCTTATCTCCGATCTCC  | qRT-PCR for tree peony |
| F01_cb3984_c5-F     | AAGTTCGGGTCATGGTTATTC | qRT-PCR for tree peony |
| F01_cb3984_c5-R     | ACGTTTGTGTGTGCATCTGTT | qRT-PCR for tree peony |
| F01_cb8475_c28561-F | AAAAGAATTGACGAGGACCAG | qRT-PCR for tree peony |
| F01_cb8475_c28561-R | AGCTCCACCATTTATGCCATC | qRT-PCR for tree peony |
| F01_cb3692_c19-F    | TCCACTCACCATCACTCCAC  | qRT-PCR for tree peony |
| F01_cb3692_c19-R    | CTCAGACATCTCCAGTTGCAT | qRT-PCR for tree peony |
| F01_cb13401_c3-F    | TCTTGTCACATATGCACTGCC | qRT-PCR for tree peony |
| F01_cb13401_c3-R    | ACCCGCAGTATTTGAAGCTTA | qRT-PCR for tree peony |
| F01_cb9156_c0-F     | CTTCATCTGCTCACTTTCAAC | qRT-PCR for tree peony |
| F01_cb9156_c0-R     | CGGGAAAATGAAGTTGTGTTG | qRT-PCR for tree peony |

**Supplementary Table 8 Primers used for qRT-PCR in transgenic tobacco.**

| <b>Primers</b>   | <b>Primer Sequences (5'-3')</b> | <b>Description</b>             |
|------------------|---------------------------------|--------------------------------|
| <i>NtTubA1-F</i> | CTCCTATGCTCCTGTCATTTTC          | qRT-PCR for transgenic tobacco |
| <i>NtTubA1-R</i> | GGCGAGGATCACACTTAAC             | qRT-PCR for transgenic tobacco |
| <i>NtbHLH-F</i>  | GCAGCAGTGTTAGCTTGGATATG         | qRT-PCR for transgenic tobacco |
| <i>NtbHLH-R</i>  | AGCAGAACTCATTGAGGAAGACC         | qRT-PCR for transgenic tobacco |
| <i>NtSPL9-F</i>  | CTCCTTTTTGGCTTCTTGCTT           | qRT-PCR for transgenic tobacco |
| <i>NtSPL9-R</i>  | CTCGCTCTTGGTGGTTTCTAA           | qRT-PCR for transgenic tobacco |
| <i>NtC4H-F</i>   | ACAACAGAGAAAGCGGGCAA            | qRT-PCR for transgenic tobacco |
| <i>NtC4H-R</i>   | AGGGGCTTTACATGACACCAA           | qRT-PCR for transgenic tobacco |
| <i>NtCHS-F</i>   | TGACACCCACTTGATAGTTTAG          | qRT-PCR for transgenic tobacco |
| <i>NtCHS-R</i>   | CGACCTCTGGAATTGGATCAG           | qRT-PCR for transgenic tobacco |
| <i>NtCHI-F</i>   | CTTTTCTCGCCGCTAAATG             | qRT-PCR for transgenic tobacco |
| <i>NtCHI-R</i>   | TTTCTGCCACCTTCTCTG              | qRT-PCR for transgenic tobacco |

|                 |                        |                                |
|-----------------|------------------------|--------------------------------|
| <i>NtF3H-F</i>  | CAAGGCATGTGTGGATATGG   | qRT-PCR for transgenic tobacco |
| <i>NtF3H-R</i>  | TGTGTCGTTTCAGTCCAAGG   | qRT-PCR for transgenic tobacco |
| <i>NtF3'H-F</i> | AGGCTCAACACTTCTCGT     | qRT-PCR for transgenic tobacco |
| <i>NtF3'H-R</i> | CATCAACTTTGGGCTTCT     | qRT-PCR for transgenic tobacco |
| <i>NtFLS-F</i>  | GAACTGAAGGGAAAAGGGTTG  | qRT-PCR for transgenic tobacco |
| <i>NtFLS-R</i>  | GTAGGAGGGAGGATTTTAGGCC | qRT-PCR for transgenic tobacco |
| <i>NtDFR-F</i>  | AACCAACAGTCAGGGGAATG   | qRT-PCR for transgenic tobacco |
| <i>NtDFR-R</i>  | TTGGACATCGACAGTTCCAG   | qRT-PCR for transgenic tobacco |

**Supplementary Table 9 Primers used for genome walking and Dual-luciferase assay.**

| <b>Primers</b>    | <b>Primer Sequences (5'-3')</b>                 | <b>Description</b>    |
|-------------------|-------------------------------------------------|-----------------------|
| <i>PsCHS-SP1</i>  | GGTGGGTGATTTAGATTTGGG                           | Genome walking        |
| <i>PsCHS-SP2</i>  | CACCATGTCTTGACGTGCATCC                          | Genome walking        |
| <i>PsCHS-SP3</i>  | CTTCGGTCAGGTACATATAGCGTT                        | Genome walking        |
| <i>PsFLS-SP1</i>  | CTCTCTCCAACCTCTGCAAC                            | Genome walking        |
| <i>PsFLS-SP2</i>  | CCCATTCTTGCTTGCACTGTC                           | Genome walking        |
| <i>PsFLS-SP3</i>  | TCTTTGCTTGCACTGTGCATGG                          | Genome walking        |
| <i>PsCHS-F</i>    | GTACCGGGCCCCCTCGAGGTCGACAGAGGAGAAGCATAGGATCGT   | Dual-luciferase assay |
| <i>PsCHS-R</i>    | GGCTGCAGGAATTCGATATCAAGCTTTTGTGTCTGGGCTCGGTT    | Dual-luciferase assay |
| <i>PsFLS-F</i>    | GTACCGGGCCCCCTCGAGGTCGACAGTGGAGTAGCAAAGGTTTG    | Dual-luciferase assay |
| <i>PsFLS-R</i>    | GGCTGCAGGAATTCGATATCAAGCTTGCTCTGTTTTGAAAGCAGA   | Dual-luciferase assay |
| <i>PsMYB111-F</i> | GGCCGCTCTAGAAGTGGATCCATGGGGAGGGCACCCCTGTTG      | Dual-luciferase assay |
| <i>PsMYB111-R</i> | ATCGATAAGCTTGATATCGAATTCTCAAGAAAGAAGCCAAGCAACCA | Dual-luciferase assay |
